# Supplementary material for: Expression of EpCAMMF and EpCAMMT variants in human carcinomas
Source: PubMed Central journal article supplement — J Clin Pathol. 2014 Jan 24;67(5):408–14. doi: 10.1136/jclinpath-2013-201932 (PMC3995261; doi:10.1136/jclinpath-2013-201932), 2014-01-24
Supplement: jclinpath-2013-201932-s1.pdf [file jclinpath-2013-201932-s1.pdf]

## Supplementary Table

| Tumour Tissue                         | EpEX Expression                       |       |          |          | EpICD Expression |       |          |        |
|---------------------------------------|---------------------------------------|-------|----------|----------|------------------|-------|----------|--------|
|                                       | Number of tissue samples analyzed (%) |       |          |          |                  |       |          |        |
|                                       | Negative                              | Weak  | Moderate | Strong   | Negative         | Weak  | Moderate | Strong |
| <b>Hodgkin Lymphoma</b>               |                                       |       |          |          |                  |       |          |        |
| Mixed cell (n=15)                     | 15 (100)                              | 0 (0) | 0 (0)    | 0 (0)    | 15 (100)         | 0 (0) | 0 (0)    | 0 (0)  |
| Nodular sclerosing (n=22)             | 22 (100)                              | 0 (0) | 0 (0)    | 0 (0)    | 22 (100)         | 0 (0) | 0 (0)    | 0 (0)  |
| <b>Non-Hodgkin lymphoma (n=60)</b>    |                                       |       |          |          |                  |       |          |        |
| 60 (100)                              | 0 (0)                                 | 0 (0) | 0 (0)    | 60 (100) | 0 (0)            | 0 (0) | 0 (0)    |        |
| <b>Brain</b>                          |                                       |       |          |          |                  |       |          |        |
| Glioblastoma (n=40)                   | 40 (100)                              | 0 (0) | 0 (0)    | 0 (0)    | 40 (100)         | 0 (0) | 0 (0)    | 0 (0)  |
| Schwannoma (n=43)                     | 43 (100)                              | 0 (0) | 0 (0)    | 0 (0)    | 43 (100)         | 0 (0) | 0 (0)    | 0 (0)  |
| Meningeoma (n=44)                     | 44 (100)                              | 0 (0) | 0 (0)    | 0 (0)    | 44 (100)         | 0 (0) | 0 (0)    | 0 (0)  |
| Oligodendroglioma (n=21)              | 21 (100)                              | 0 (0) | 0 (0)    | 0 (0)    | 21 (100)         | 0 (0) | 0 (0)    | 0 (0)  |
| Neurofibroma (n=40)                   | 40 (100)                              | 0 (0) | 0 (0)    | 0 (0)    | 40 (100)         | 0 (0) | 0 (0)    | 0 (0)  |
| Astrocytoma (n=43)                    | 43 (100)                              | 0 (0) | 0 (0)    | 0 (0)    | 43 (100)         | 0 (0) | 0 (0)    | 0 (0)  |
| <b>Soft tissue</b>                    |                                       |       |          |          |                  |       |          |        |
| Tendon sheath giant cell tumor (n=26) | 26 (100)                              | 0 (0) | 0 (0)    | 0 (0)    | 26 (100)         | 0 (0) | 0 (0)    | 0 (0)  |
| Benign Histiocytoma (n=25)            | 25 (100)                              | 0 (0) | 0 (0)    | 0 (0)    | 25 (100)         | 0 (0) | 0 (0)    | 0 (0)  |
| Lipoma (n=29)                         | 29 (100)                              | 0 (0) | 0 (0)    | 0 (0)    | 29 (100)         | 0 (0) | 0 (0)    | 0 (0)  |
| Hemangioma (n=31)                     | 31 (100)                              | 0 (0) | 0 (0)    | 0 (0)    | 31 (100)         | 0 (0) | 0 (0)    | 0 (0)  |
| Malignant fibrous Histiocytoma (n=27) | 27 (100)                              | 0 (0) | 0 (0)    | 0 (0)    | 27 (100)         | 0 (0) | 0 (0)    | 0 (0)  |
| Leiomyosarcoma (n=42)                 | 42 (100)                              | 0 (0) | 0 (0)    | 0 (0)    | 42 (100)         | 0 (0) | 0 (0)    | 0 (0)  |
| Kaposi Sarcoma (n=23)                 | 23 (100)                              | 0 (0) | 0 (0)    | 0 (0)    | 23 (100)         | 0 (0) | 0 (0)    | 0 (0)  |
| Liposarcoma (n=26)                    | 26 (100)                              | 0 (0) | 0 (0)    | 0 (0)    | 26 (100)         | 0 (0) | 0 (0)    | 0 (0)  |
